# Supplementary material for: [Retracted] Identifying COVID‐19‐Specific Transcriptomic Biomarkers with Machine Learning Methods
Source: Hindawi journal article supplement (doi:10.1155/2021/9939134), 2021-01-01
Supplement: f4 [file 9939134.f4.pdf]

**Table S4.** Rules generated from DT analysis.

|                                          |                                                      |
|------------------------------------------|------------------------------------------------------|
| Rules_0                                  | passed counts:59                                     |
| node_0: feature_name=SORT1               | feature_id[66].value <= threshold=16.202244758605957 |
| node_1: feature_name=RPL21P28            | feature_id[85].value <= threshold=34.776649475097656 |
| node_2: feature_name=GZMB                | feature_id[255].value > threshold=117.4085464477539  |
| node_6: feature_name=SIDT2               | feature_id[492].value <= threshold=56.57046127319336 |
| node_7: feature_name=TKT                 | feature_id[278].value <= threshold=724.8254699707031 |
| Class: Patient with SARS-CoV-2 infection |                                                      |
|                                          |                                                      |
| Rules_1                                  | passed counts:47                                     |
| node_0: feature_name=SORT1               | feature_id[66].value > threshold=16.202244758605957  |
| node_18: feature_name=HK3                | feature_id[220].value <= threshold=687.6101684570312 |
| node_19: feature_name=CDKN1A             | feature_id[90].value <= threshold=65.20165252685547  |
| node_20: feature_name=HMGN3              | feature_id[35].value <= threshold=78.5991096496582   |
| node_21: feature_name=CACNA1I            | feature_id[491].value <= threshold=6.860291481018066 |
| node_22: feature_name=ATP6V1D            | feature_id[488].value <= threshold=24.75236225128174 |
| Class: Patient with seasonal coronavirus |                                                      |
|                                          |                                                      |
| Rules_2                                  | passed counts:23                                     |
| node_0: feature_name=SORT1               | feature_id[66].value > threshold=16.202244758605957  |
| node_18: feature_name=HK3                | feature_id[220].value > threshold=687.6101684570312  |
| node_38: feature_name=BAZ1A              | feature_id[43].value > threshold=46.80592918395996   |
| Class: Patient with bacterial pneumonia  |                                                      |
|                                          |                                                      |

|                                          |                                                      |
|------------------------------------------|------------------------------------------------------|
| Rules_3                                  | passed counts:15                                     |
| node_0: feature_name=SORT1               | feature_id[66].value > threshold=16.202244758605957  |
| node_18: feature_name=HK3                | feature_id[220].value <= threshold=687.6101684570312 |
| node_19: feature_name=CDKN1A             | feature_id[90].value > threshold=65.20165252685547   |
| node_31: feature_name=NLRC5              | feature_id[215].value > threshold=90.33353805541992  |
| node_35: feature_name=DACH1              | feature_id[158].value > threshold=0.1391642689704895 |
| Class: Patient with influenza            |                                                      |
|                                          |                                                      |
| Rules_4                                  | passed counts:11                                     |
| node_0: feature_name=SORT1               | feature_id[66].value <= threshold=16.202244758605957 |
| node_1: feature_name=RPL21P28            | feature_id[85].value > threshold=34.776649475097656  |
| node_11: feature_name=RTN1               | feature_id[494].value > threshold=7.122348785400391  |
| Class: Healthy control                   |                                                      |
|                                          |                                                      |
| Rules_5                                  | passed counts:7                                      |
| node_0: feature_name=SORT1               | feature_id[66].value > threshold=16.202244758605957  |
| node_18: feature_name=HK3                | feature_id[220].value <= threshold=687.6101684570312 |
| node_19: feature_name=CDKN1A             | feature_id[90].value > threshold=65.20165252685547   |
| node_31: feature_name=NLRC5              | feature_id[215].value <= threshold=90.33353805541992 |
| node_32: feature_name=YBX3               | feature_id[442].value <= threshold=180.2283172607422 |
| Class: Patient with SARS-CoV-2 infection |                                                      |
|                                          |                                                      |
| Rules_6                                  | passed counts:7                                      |
| node_0: feature_name=SORT1               | feature_id[66].value > threshold=16.202244758605957  |
| node_18: feature_name=HK3                | feature_id[220].value <= threshold=687.6101684570312 |

|                                          |                                                       |
|------------------------------------------|-------------------------------------------------------|
| node_19: feature_name=CDKN1A             | feature_id[90].value <= threshold=65.20165252685547   |
| node_20: feature_name=HMGN3              | feature_id[35].value > threshold=78.5991096496582     |
| node_26: feature_name=CCNB2              | feature_id[408].value <= threshold=2.7654906511306763 |
| Class: Healthy control                   |                                                       |
|                                          |                                                       |
| Rules_7                                  | passed counts:6                                       |
| node_0: feature_name=SORT1               | feature_id[66].value <= threshold=16.202244758605957  |
| node_1: feature_name=RPL21P28            | feature_id[85].value <= threshold=34.776649475097656  |
| node_2: feature_name=GZMB                | feature_id[255].value <= threshold=117.4085464477539  |
| node_3: feature_name=ACSL1               | feature_id[167].value <= threshold=379.62129974365234 |
| Class: Patient with seasonal coronavirus |                                                       |
|                                          |                                                       |
| Rules_8                                  | passed counts:4                                       |
| node_0: feature_name=SORT1               | feature_id[66].value > threshold=16.202244758605957   |
| node_18: feature_name=HK3                | feature_id[220].value <= threshold=687.6101684570312  |
| node_19: feature_name=CDKN1A             | feature_id[90].value <= threshold=65.20165252685547   |
| node_20: feature_name=HMGN3              | feature_id[35].value <= threshold=78.5991096496582    |
| node_21: feature_name=CACNA1I            | feature_id[491].value > threshold=6.860291481018066   |
| Class: Patient with SARS-CoV-2 infection |                                                       |
|                                          |                                                       |
| Rules_9                                  | passed counts:2                                       |
| node_0: feature_name=SORT1               | feature_id[66].value > threshold=16.202244758605957   |
| node_18: feature_name=HK3                | feature_id[220].value <= threshold=687.6101684570312  |
| node_19: feature_name=CDKN1A             | feature_id[90].value > threshold=65.20165252685547    |
| node_31: feature_name=NLRC5              | feature_id[215].value <= threshold=90.33353805541992  |

|                                          |                                                       |
|------------------------------------------|-------------------------------------------------------|
| node_32: feature_name=YBX3               | feature_id[442].value > threshold=180.2283172607422   |
| Class: Patient with seasonal coronavirus |                                                       |
|                                          |                                                       |
| Rules_10                                 | passed counts:2                                       |
| node_0: feature_name=SORT1               | feature_id[66].value > threshold=16.202244758605957   |
| node_18: feature_name=HK3                | feature_id[220].value <= threshold=687.6101684570312  |
| node_19: feature_name=CDKN1A             | feature_id[90].value <= threshold=65.20165252685547   |
| node_20: feature_name=HMGN3              | feature_id[35].value > threshold=78.5991096496582     |
| node_26: feature_name=CCNB2              | feature_id[408].value > threshold=2.7654906511306763  |
| node_28: feature_name=MAFG               | feature_id[46].value <= threshold=18.44084358215332   |
| Class: Patient with SARS-CoV-2 infection |                                                       |
|                                          |                                                       |
| Rules_11                                 | passed counts:2                                       |
| node_0: feature_name=SORT1               | feature_id[66].value <= threshold=16.202244758605957  |
| node_1: feature_name=RPL21P28            | feature_id[85].value > threshold=34.776649475097656   |
| node_11: feature_name=RTN1               | feature_id[494].value <= threshold=7.122348785400391  |
| node_12: feature_name=RPL26L1            | feature_id[219].value > threshold=13.224897384643555  |
| node_14: feature_name=TAP2               | feature_id[458].value <= threshold=39.95484447479248  |
| Class: Patient with SARS-CoV-2 infection |                                                       |
|                                          |                                                       |
| Rules_12                                 | passed counts:2                                       |
| node_0: feature_name=SORT1               | feature_id[66].value <= threshold=16.202244758605957  |
| node_1: feature_name=RPL21P28            | feature_id[85].value > threshold=34.776649475097656   |
| node_11: feature_name=RTN1               | feature_id[494].value <= threshold=7.122348785400391  |
| node_12: feature_name=RPL26L1            | feature_id[219].value <= threshold=13.224897384643555 |

|                                          |                                                       |
|------------------------------------------|-------------------------------------------------------|
| Class: Patient with seasonal coronavirus |                                                       |
|                                          |                                                       |
| Rules_13                                 | passed counts:1                                       |
| node_0: feature_name=SORT1               | feature_id[66].value > threshold=16.202244758605957   |
| node_18: feature_name=HK3                | feature_id[220].value > threshold=687.6101684570312   |
| node_38: feature_name=BAZ1A              | feature_id[43].value <= threshold=46.80592918395996   |
| Class: Patient with SARS-CoV-2 infection |                                                       |
|                                          |                                                       |
| Rules_14                                 | passed counts:1                                       |
| node_0: feature_name=SORT1               | feature_id[66].value > threshold=16.202244758605957   |
| node_18: feature_name=HK3                | feature_id[220].value <= threshold=687.6101684570312  |
| node_19: feature_name=CDKN1A             | feature_id[90].value > threshold=65.20165252685547    |
| node_31: feature_name=NLRC5              | feature_id[215].value > threshold=90.33353805541992   |
| node_35: feature_name=DACH1              | feature_id[158].value <= threshold=0.1391642689704895 |
| Class: Patient with seasonal coronavirus |                                                       |
|                                          |                                                       |
| Rules_15                                 | passed counts:1                                       |
| node_0: feature_name=SORT1               | feature_id[66].value > threshold=16.202244758605957   |
| node_18: feature_name=HK3                | feature_id[220].value <= threshold=687.6101684570312  |
| node_19: feature_name=CDKN1A             | feature_id[90].value <= threshold=65.20165252685547   |
| node_20: feature_name=HMGN3              | feature_id[35].value > threshold=78.5991096496582     |
| node_26: feature_name=CCNB2              | feature_id[408].value > threshold=2.7654906511306763  |
| node_28: feature_name=MAFG               | feature_id[46].value > threshold=18.44084358215332    |
| Class: Patient with seasonal coronavirus |                                                       |
|                                          |                                                       |

|                                          |                                                      |
|------------------------------------------|------------------------------------------------------|
| Rules_16                                 | passed counts:1                                      |
| node_0: feature_name=SORT1               | feature_id[66].value > threshold=16.202244758605957  |
| node_18: feature_name=HK3                | feature_id[220].value <= threshold=687.6101684570312 |
| node_19: feature_name=CDKN1A             | feature_id[90].value <= threshold=65.20165252685547  |
| node_20: feature_name=HMGN3              | feature_id[35].value <= threshold=78.5991096496582   |
| node_21: feature_name=CACNA1I            | feature_id[491].value <= threshold=6.860291481018066 |
| node_22: feature_name=ATP6V1D            | feature_id[488].value > threshold=24.75236225128174  |
| Class: Patient with SARS-CoV-2 infection |                                                      |
|                                          |                                                      |
| Rules_17                                 | passed counts:1                                      |
| node_0: feature_name=SORT1               | feature_id[66].value <= threshold=16.202244758605957 |
| node_1: feature_name=RPL21P28            | feature_id[85].value > threshold=34.776649475097656  |
| node_11: feature_name=RTN1               | feature_id[494].value <= threshold=7.122348785400391 |
| node_12: feature_name=RPL26L1            | feature_id[219].value > threshold=13.224897384643555 |
| node_14: feature_name=TAP2               | feature_id[458].value > threshold=39.95484447479248  |
| Class: Patient with influenza            |                                                      |
|                                          |                                                      |
| Rules_18                                 | passed counts:1                                      |
| node_0: feature_name=SORT1               | feature_id[66].value <= threshold=16.202244758605957 |
| node_1: feature_name=RPL21P28            | feature_id[85].value <= threshold=34.776649475097656 |
| node_2: feature_name=GZMB                | feature_id[255].value > threshold=117.4085464477539  |
| node_6: feature_name=SIDT2               | feature_id[492].value > threshold=56.57046127319336  |
| Class: Patient with influenza            |                                                      |
|                                          |                                                      |
| Rules_19                                 | passed counts:1                                      |

|                                          |                                                      |
|------------------------------------------|------------------------------------------------------|
| node_0: feature_name=SORT1               | feature_id[66].value <= threshold=16.202244758605957 |
| node_1: feature_name=RPL21P28            | feature_id[85].value <= threshold=34.776649475097656 |
| node_2: feature_name=GZMB                | feature_id[255].value > threshold=117.4085464477539  |
| node_6: feature_name=SIDT2               | feature_id[492].value <= threshold=56.57046127319336 |
| node_7: feature_name=TKT                 | feature_id[278].value > threshold=724.8254699707031  |
| Class: Healthy control                   |                                                      |
|                                          |                                                      |
| Rules_20                                 | passed counts:1                                      |
| node_0: feature_name=SORT1               | feature_id[66].value <= threshold=16.202244758605957 |
| node_1: feature_name=RPL21P28            | feature_id[85].value <= threshold=34.776649475097656 |
| node_2: feature_name=GZMB                | feature_id[255].value <= threshold=117.4085464477539 |
| node_3: feature_name=ACSL1               | feature_id[167].value > threshold=379.62129974365234 |
| Class: Patient with SARS-CoV-2 infection |                                                      |
